# Supplementary material for: The nitrogen removal performance and microbial communities in a pilot multistage trickling constructed wetland for purifying polluted groundwater
Source: Royal Society of Chemistry journal article supplement (doi:10.1039/d2ew00229a), 2022-01-01
Supplement: d2ew00229a1.pdf [file d2ew00229a1.pdf]

**Supplementary Materials for manuscript**

**The nitrogen removal performance and microbial communities in a pilot  
multistage trickling constructed wetland for purifying polluted groundwater**

Dan Xu <sup>a</sup>, Huilan Ling <sup>a</sup>, Zebing Li <sup>a</sup>, Yun Li <sup>a</sup>, Renxiang Chen <sup>b</sup>, Bai Gao <sup>a,\*</sup>

<sup>a</sup> *State Key Laboratory of Nuclear Resources and Environment, East China University  
of Technology, Nanchang 330013, PR China*

<sup>b</sup> *264 Brigade of the Jiangxi Nuclear Industry Geological Bureau, Nanchang 341000,  
PR China*

*\*Corresponding author. E-mail: 199860039@ecut.edu.cn (Bai Gao)*

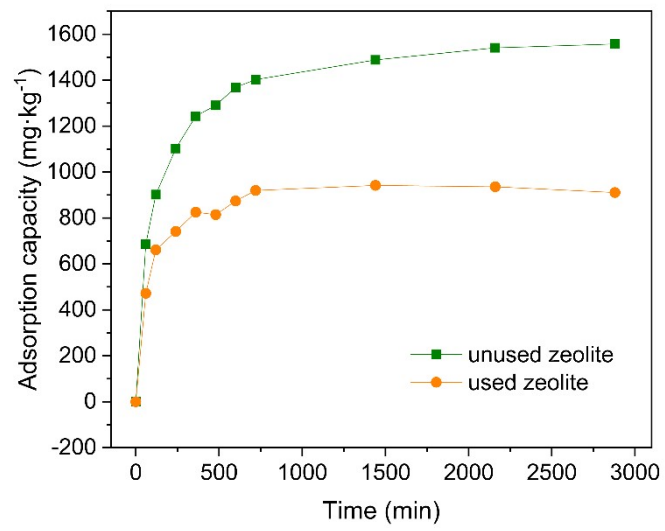

**Fig. S1** Adsorption capacity of zeolite before and after use.

**Table S1** Element analysis of the six substrates (100%).

| Composition | TCWs-A | TCWs-B | TCWs-C | TCWc-A | TCWc-B | TCWc-C |
|-------------|--------|--------|--------|--------|--------|--------|
| Si          | 68.61  | 30.43  | 17.44  | 67.97  | 30.46  | 17.12  |
| Fe          | 4.93   | 23.38  | 48.02  | 5.41   | 23.50  | 46.71  |
| Ca          | 4.36   | 13.05  | 12.34  | 3.78   | 13.35  | 17.23  |
| Al          | 10.17  | 9.33   | 7.49   | 10.52  | 9.39   | 7.00   |
| Mg          | 1.10   | 6.98   | 0.75   | 1.07   | 6.80   | 0.90   |
| Na          | 1.06   | 4.59   | 0.59   | 0.97   | 4.63   | 0.24   |
| Ti          | 0.60   | 4.84   | 1.50   | 0.60   | 4.73   | 1.42   |
| K           | 8.18   | 4.57   | 4.58   | 8.76   | 4.63   | 3.72   |
| Px          | 0.11   | 0.85   | 3.87   | 0.25   | 0.85   | 3.04   |
| Mn          | 0.10   | 0.39   | 0.62   | 0.09   | 0.40   | 0.24   |
| Sr          | 0.25   | 0.30   | 0.04   | 0.16   | 0.28   | 0.03   |
| Zr          | 0.09   | 0.21   | 0.07   | 0.08   | 0.20   | 0.05   |
| Cl          | --     | 0.19   | 1.00   | 0.03   | 0.20   | 0.46   |
| W           | 0.13   | 0.39   | --     | 0.06   | 0.20   | --     |
| Ba          | --     | 0.07   | --     | --     | --     | --     |
| V           | 0.01   | 0.07   | 0.05   | 0.01   | 0.06   | 0.04   |
| Ni          | 0.01   | 0.07   | 0.04   | 0.01   | 0.06   | 0.05   |
| S           | 0.08   | 0.05   | 1.00   | 0.06   | --     | 1.02   |
| Zn          | 0.04   | 0.04   | 0.15   | 0.04   | 0.04   | 0.18   |
| Nb          | 0.01   | 0.04   | --     | --     | 0.04   | --     |
| Cr          | 0.01   | 0.05   | 0.05   | --     | 0.04   | 0.05   |
| Co          | 0.02   | 0.05   | --     | 0.01   | 0.05   | --     |
| Ce          | 0.03   | --     | --     | --     | --     | --     |
| Nd          | 0.01   | --     | --     | --     | --     | 0.04   |
| Y           | 0.01   | 0.01   | 0.01   | 0.01   | 0.01   | --     |
| Cu          | 0.00   | 0.02   | 0.11   | 0.01   | 0.02   | 0.13   |

---

|    |      |      |      |      |      |      |
|----|------|------|------|------|------|------|
| Rb | 0.04 | 0.01 | 0.05 | 0.04 | 0.01 | 0.04 |
| Gd | --   | --   | --   | --   | --   | --   |
| Mo | --   | --   | --   | 0.01 | --   | --   |
| Ga | 0.01 | 0.00 | 0.03 | 0.00 | 0.01 | --   |
| Ag | --   | 0.01 | 0.06 | 0.02 | 0.01 | 0.07 |
| Sn | --   | --   | 0.05 | --   | --   | 0.06 |
| La | 0.02 | --   | --   | 0.02 | --   | --   |
| Pb | 0.02 | --   | 0.06 | 0.02 | --   | --   |
| Pd | 0.02 | --   | --   | 0.02 | --   | 0.04 |
| Sx | --   | --   | --   | --   | 0.06 | --   |
| Ce | --   | --   | --   | --   | --   | 0.08 |
| Hg | --   | --   | --   | --   | --   | 0.04 |
| Br | --   | --   | 0.01 | --   | --   | 0.02 |
| Bi | 0.01 | --   | --   | --   | --   | --   |
| Ru | --   | --   | 0.02 | --   | --   | --   |

---
